# Supplementary material
Source: Springer Nature journal article supplement (https://www.springermedizin.de/resource/supplementary/12871_2011_132_MOESM1_ESM.pdf/9428976)

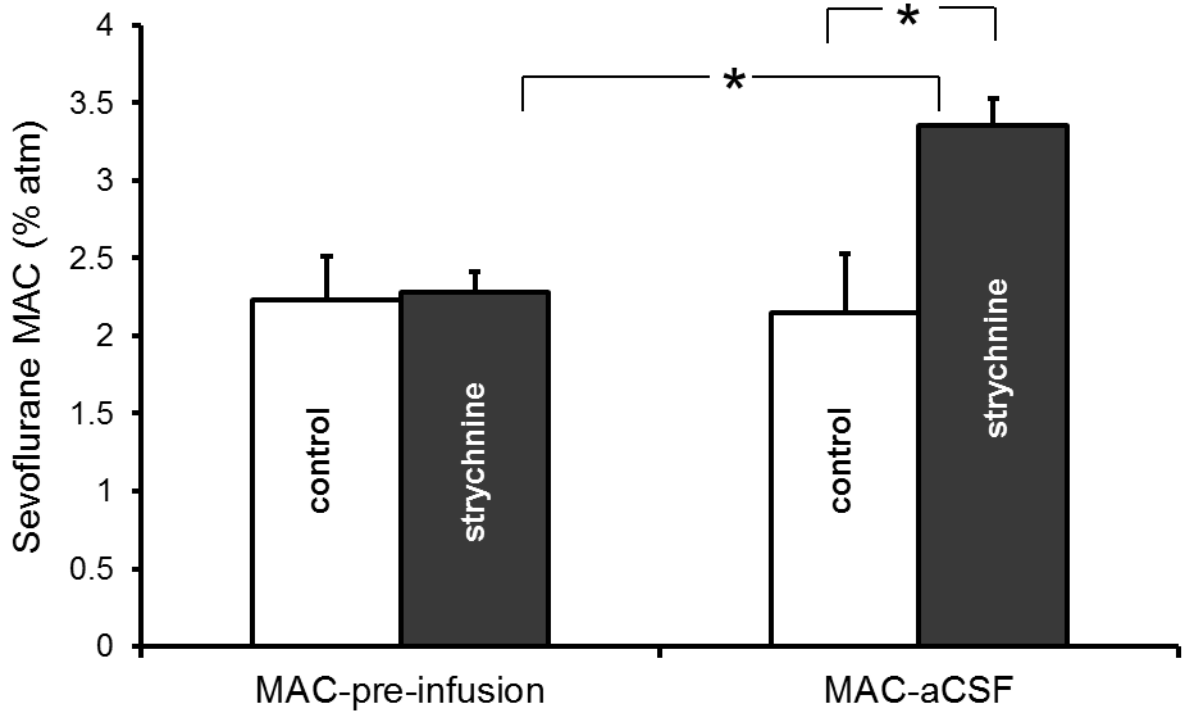

Supplement: MOESM1 [file 9428976]
